# Supplementary material for: Peritherapeutic Serum p53 Antibody Titers are Predictors of Survival in Patients with Esophageal Squamous Cell Carcinoma Undergoing Neoadjuvant Chemotherapy and Surgery
Source: Springer Nature journal article supplement (doi:10.1007/s00268-017-3894-x), 2017-01-20
Supplement: MOESM1 [file 12010474]

***Supplementary material 1***

*Preoperative chemotherapy*

All 136 consecutive patients received preoperative chemotherapy consisting of cisplatin, 5-FU, and either adriamycin or docetaxel, followed by esophagectomy. Our indication for preoperative chemotherapy was based on the TMN classification as follows: cT1-3N1-3 as an absolute indication and either cT2-3N0 with a larger primary tumor or any case of cT4N except those with massive infiltration of the bronchus or aorta as a relative indication. Patients who underwent preoperative chemotherapy had an Eastern Cooperative Oncology Group performance status of 0–1 and normal bone marrow, kidney, and liver function [[1](#_ENREF_1), [2](#_ENREF_2)].

**REFERENCES**

1. Makino T, Miyata H, Yamasaki M*, et al.* (2010) Utility of response evaluation to neo-adjuvant chemotherapy by (18)F-fluorodeoxyglucose-positron emission tomography in locally advanced esophageal squamous cell carcinoma Surgery 148;908-918

2. Yamashita K, Makino T, Miyata H*, et al.* (2016) Postoperative Infectious Complications are Associated with Adverse Oncologic Outcomes in Esophageal Cancer Patients Undergoing Preoperative Chemotherapy Ann Surg Oncol 23;2106-2114
